# Supplementary material for: Influenza A virus PB1-F2 protein prolongs viral shedding in chickens lengthening the transmission window
Source: PubMed Central journal article supplement (PMC5078828; doi:10.1099/jgv.0.000584), 2016-10-13
Supplement: jgv-97-2516-s001.pdf [file jgv-97-2516-s001.pdf]

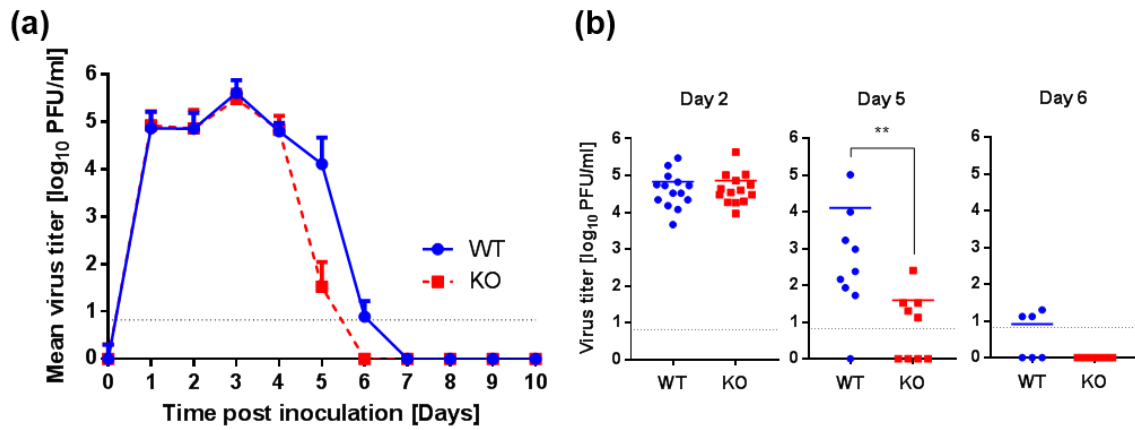

Fig S1. Virus shedding from the buccal cavity of low dose inoculated chickens and environmental viral titres.

Infectious virus from groups of 20 chickens inoculated with  $5 \times 10^3$  pfu (low dose) with either WT (Blue circles) or KO (red squares) UDL01 influenza virus. Grey dotted baselines indicate limit of detection. (a) Mean infectious virus titres from buccal swabs. (b) Buccal shedding titres from individual birds at 2, 5 and 6 days post inoculation. Means  $\pm$ SD are shown. Levels of significance were based upon P-values from a Mann-Whitney U-test; \*\*P<0.001.

**Table S1.** Percentage of influenza A sequences possessing PB1-F2  $\geq 79$ aa,  $\geq 87$ aa or  $\geq 90$ aa isolated from avian, human and swine hosts.

| <b>Host</b>     | <b>Number of sequences analysed</b> | <b>% sequences with PB1-F2 <math>\geq 79</math>aa</b> | <b>% sequences with PB1-F2 <math>\geq 87</math>aa</b> | <b>% sequences with PB1-F2 <math>\geq 90</math>aa</b> |
|-----------------|-------------------------------------|-------------------------------------------------------|-------------------------------------------------------|-------------------------------------------------------|
| <b>Avian*</b>   | 10401                               | 96                                                    | 93                                                    | 93                                                    |
| Anseriformes    | 6917                                | 97                                                    | 97                                                    | 94                                                    |
| Galliformes     | 1804                                | 92                                                    | 87                                                    | 85                                                    |
| Charadriiformes | 1298                                | 98                                                    | 98                                                    | 97                                                    |
| <b>Human</b>    | 11729                               | 43                                                    | 42                                                    | 42                                                    |
| <b>Swine</b>    | 2673                                | 56                                                    | 48                                                    | 48                                                    |
| <b>Total</b>    | 24803                               | 67                                                    | 65                                                    | 64                                                    |

\*All avian orders

**Table S2.** Minimum infectious dose and minimum lethal dose of UDL-1 WT and KO in chicken embryos

| <b>Virus</b> | <b>Minimum Infectious Dose (Pfu)<sup>a</sup></b> | <b>Minimum Lethal Dose (Pfu)<sup>b</sup></b> | <b>Viral M gene RNA copy number / ml allantoic fluid<sup>*#</sup></b> | <b>Viral genome: pfu ratio</b> |
|--------------|--------------------------------------------------|----------------------------------------------|-----------------------------------------------------------------------|--------------------------------|
| WT           | 0.1                                              | 1                                            | $5.08 \times 10^7$ ( $\pm 2.82 \times 10^7$ )                         | 14.5 ( $\pm 2.13$ )            |
| KO           | 0.1                                              | 0.01                                         | $7.29 \times 10^7$ ( $\pm 3.11 \times 10^7$ )                         | 12.39 ( $\pm 4.37$ )           |

<sup>a</sup> The lowest dose required to cause infection in 100% of eggs receiving that dosage by 72 hours post infection.

<sup>b</sup> The lowest dose required to cause 100% mortality in all infected eggs receiving that dosage by 72 hours post infection.

\*100 pfu inoculation.

# Mean ( $\pm$  standard deviation).

**Table S3.** Percentage of influenza A possessing full-length ( $\geq 87$ aa) PB1-F2 isolated from LPAI and HPAI.

| <b>Virus Subtype</b> | <b>Pathogenicity*</b> | <b>% <math>\geq 87</math>aa PB1-F2 (n)</b> |
|----------------------|-----------------------|--------------------------------------------|
| <b>H5 and H7</b>     | HPAI <sup>a</sup>     | 88 (1213)                                  |
|                      | LPAI <sup>b</sup>     | 91 (1508)                                  |
|                      | All Sequences         | 90 (2721)                                  |
| <b>H5</b>            | HPAI                  | 87 (1104)                                  |
|                      | LPAI                  | 94 (487)                                   |
|                      | All Sequences         | 89 (1591)                                  |
| <b>H7</b>            | HPAI                  | 100 (109)                                  |
|                      | LPAI                  | 90 (1021)                                  |
|                      | All Sequences         | 91 (1130)                                  |

\*Pathogenicity determined by presence or absence of a polybasic site (>two basic amino acids) in the Hemagglutinin cleavage site

<sup>a</sup> Highly Pathogenic avian influenza

<sup>b</sup> Low Pathogenicity avian influenza

**Table S4.** Distribution of different length PB1-F2 genes encoded by avian isolated influenza viruses arranged by hemagglutinin subtype.

| PB1-F2<br>Length (aa)    | % length PB1-F2 by Hemagglutinin Subtype |      |      |      |      |      |      |      |      |      |      |      |      |     |     |      |
|--------------------------|------------------------------------------|------|------|------|------|------|------|------|------|------|------|------|------|-----|-----|------|
|                          | 1*                                       | 2    | 3    | 4    | 5    | 6    | 7    | 8    | 9    | 10   | 11   | 12   | 13   | 14  | 15  | 16   |
| <b>Sequences<br/>(n)</b> | 529                                      | 404  | 1323 | 1278 | 2222 | 1194 | 1404 | 139  | 1000 | 787  | 471  | 158  | 80   | 14  | 9   | 30   |
| <b>8</b>                 |                                          | 0.3  |      | 0.1  | 0.5  | 0.3  | 0.6  |      |      | 0.5  |      |      | 1.3  |     |     |      |
| <b>11</b>                | 2.5                                      | 0.3  | 0.1  | 0.1  | 1.9  | 1.3  | 0.1  |      | 1.4  |      |      |      |      |     |     |      |
| <b>24</b>                |                                          |      |      |      | 0.3  | 0.1  |      |      | 0.1  |      |      |      |      |     |     |      |
| <b>25</b>                | 0.2                                      | 0.5  |      | 0.1  | 0.3  | 0.2  | 1.1  |      | 2.7  | 0.1  | 0.2  |      |      |     |     |      |
| <b>27</b>                |                                          |      |      | 0.2  |      |      |      |      | 0.1  |      |      |      |      |     |     |      |
| <b>34</b>                |                                          |      |      |      | 0.1  | 4.1  | 3.3  |      | 2.9  | 4.8  | 0.4  |      |      |     |     |      |
| <b>56</b>                |                                          |      |      |      | 0.6  | 3.4  |      |      | 0.1  |      |      |      |      |     |     |      |
| <b>57</b>                |                                          | 0.3  | 0.1  | 0.1  | 5.8  | 1.6  | 2.4  |      | 1.3  |      |      |      | 11.3 |     |     | 16.7 |
| <b>63</b>                |                                          |      |      |      | 0.1  | 0.6  |      |      |      |      |      |      |      |     |     |      |
| <b>76</b>                |                                          |      |      |      | 0.1  | 0.2  | 0.9  |      | 0.3  |      |      |      |      |     |     |      |
| <b>79</b>                |                                          |      | 0.5  |      | 0.3  | 0.3  | 0.1  |      | 10.2 |      |      |      |      |     |     |      |
| <b>87</b>                | 3                                        | 2.7  | 2.6  | 2.9  | 2    | 4.8  | 1.1  | 4.3  | 1.4  | 2.3  | 4.5  | 1.3  |      |     |     |      |
| <b>90</b>                | 94.3                                     | 96.0 | 96.7 | 96.2 | 87.8 | 83.1 | 90.2 | 95.7 | 78.7 | 91.2 | 94.9 | 98.7 | 87.5 | 100 | 100 | 83.3 |
| <b>101</b>               |                                          |      | 0.2  | 0.3  | 0.4  | 0.2  | 0.3  |      | 0.8  | 1    |      |      |      |     |     |      |
| <b>≥79</b>               | 97.4                                     | 98.8 | 99.9 | 99.5 | 90.5 | 88.3 | 91.7 | 100  | 91.1 | 94.5 | 99.4 | 100  | 87.5 | 100 | 100 | 83.3 |
| <b>≥87</b>               | 97.4                                     | 98.8 | 99.4 | 99.5 | 90.1 | 88   | 91.6 | 100  | 80.9 | 94.5 | 99.4 | 100  | 87.5 | 100 | 100 | 83.3 |
| <b>≥90</b>               | 94.3                                     | 96   | 96.8 | 96.6 | 88.2 | 83.3 | 90.5 | 95.7 | 79.5 | 92.3 | 94.9 | 98.7 | 87.5 | 100 | 100 | 83.3 |

\* Hemagglutinin subtype

**Table S5.** Percentage of influenza A sequences possessing a full length PB1-F2  $\geq 87$ aa isolated from individual avian orders.

| Host             | Number of sequences analysed | % sequences with PB1-F2 $\geq 87$ aa |
|------------------|------------------------------|--------------------------------------|
| All Orders       | 10401                        | 93                                   |
| Accipitriformes  | 24                           | 96                                   |
| Anseriformes     | 6928                         | 97                                   |
| Charadriiformes  | 1298                         | 98                                   |
| Ciconiiformes    | 37                           | 100                                  |
| Columbiformes    | 31                           | 87                                   |
| Galliforms       | 1804                         | 85                                   |
| Gruiformes       | 16                           | 94                                   |
| Pelecaniformes   | 13                           | 85                                   |
| Podicipediformes | 17                           | 88                                   |
| Psittaciformes   | 5                            | 80                                   |
| Ratites          | 21                           | 100                                  |
| Suliformes       | 2                            | 100                                  |
